# Supplementary figures and images for: Impact of short‐acting vs. standard anaesthetic agents on obstructive sleep apnoea: a randomised, controlled, triple‐blind trial
Source: PubMed Central journal article supplement — Anaesthesia. 2020 Aug 17;76(1):45–53. doi: 10.1111/anae.15236 (PMC7754482; doi:10.1111/anae.15236), 2020-08-17

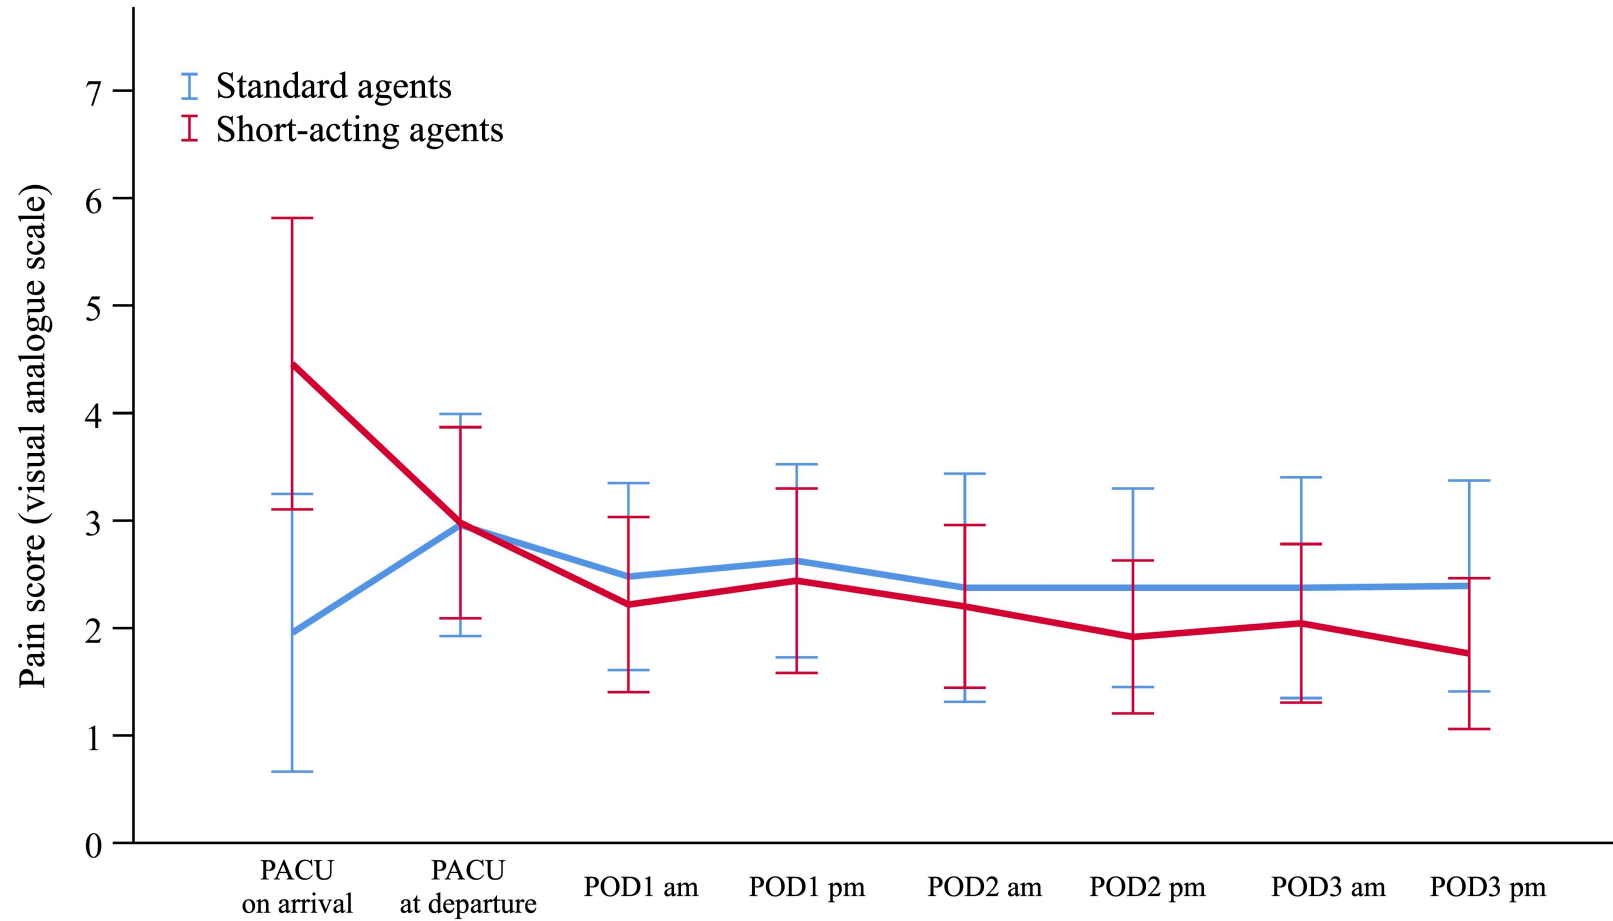

Supplement: ANAE-76-45-s001.pdf [file ANAE-76-45-s001.pdf]
